# Supplementary material for: The Effect of Molecular Weight on the (Re)-Processability and Material Properties of Bio-Based, Thermoreversibly Cross-Linked Polyesters
Source: MDPI journal article supplement (doi:10.3390/app12147287), 2022-07-20
Supplement: s1 [file s1]

# H-NMR of DPA, DPAFUR and DPAFURTCL

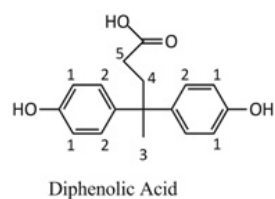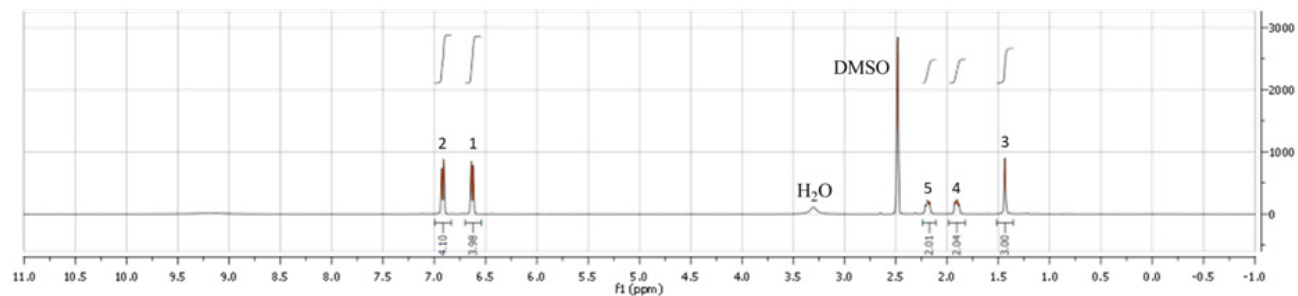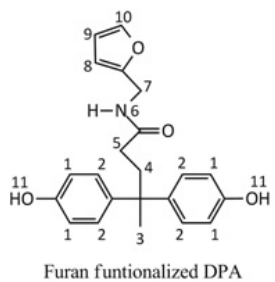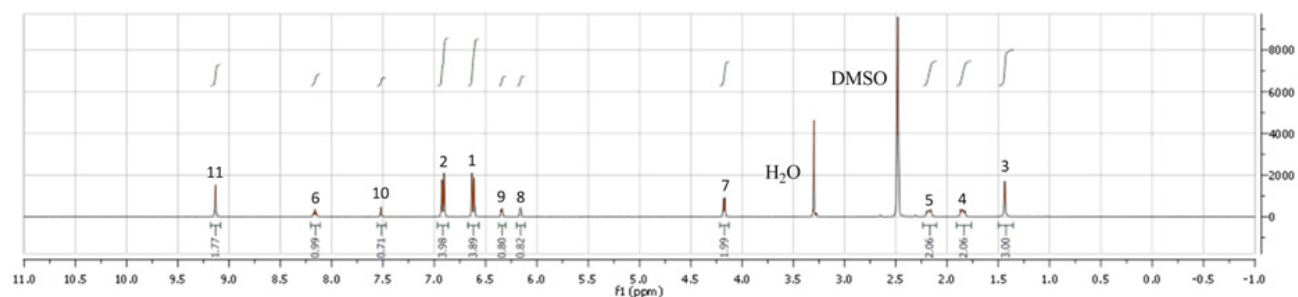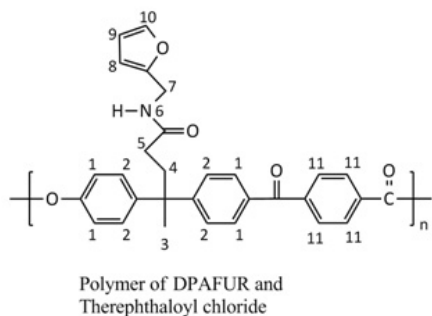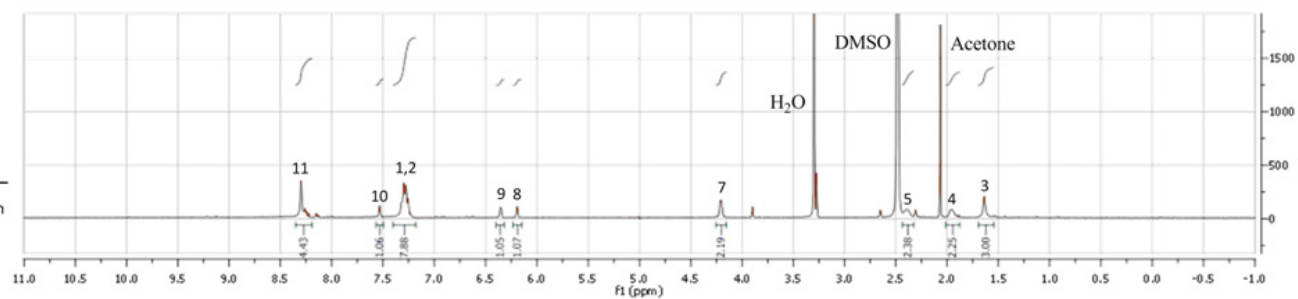

## H NMR of DA and rDA reaction

Top=NMR spectrum immediately after mixing the polymer and crosslinker

Middle= NMR spectrum after crosslinking

Bottom= NMR spectrum after decrosslinking

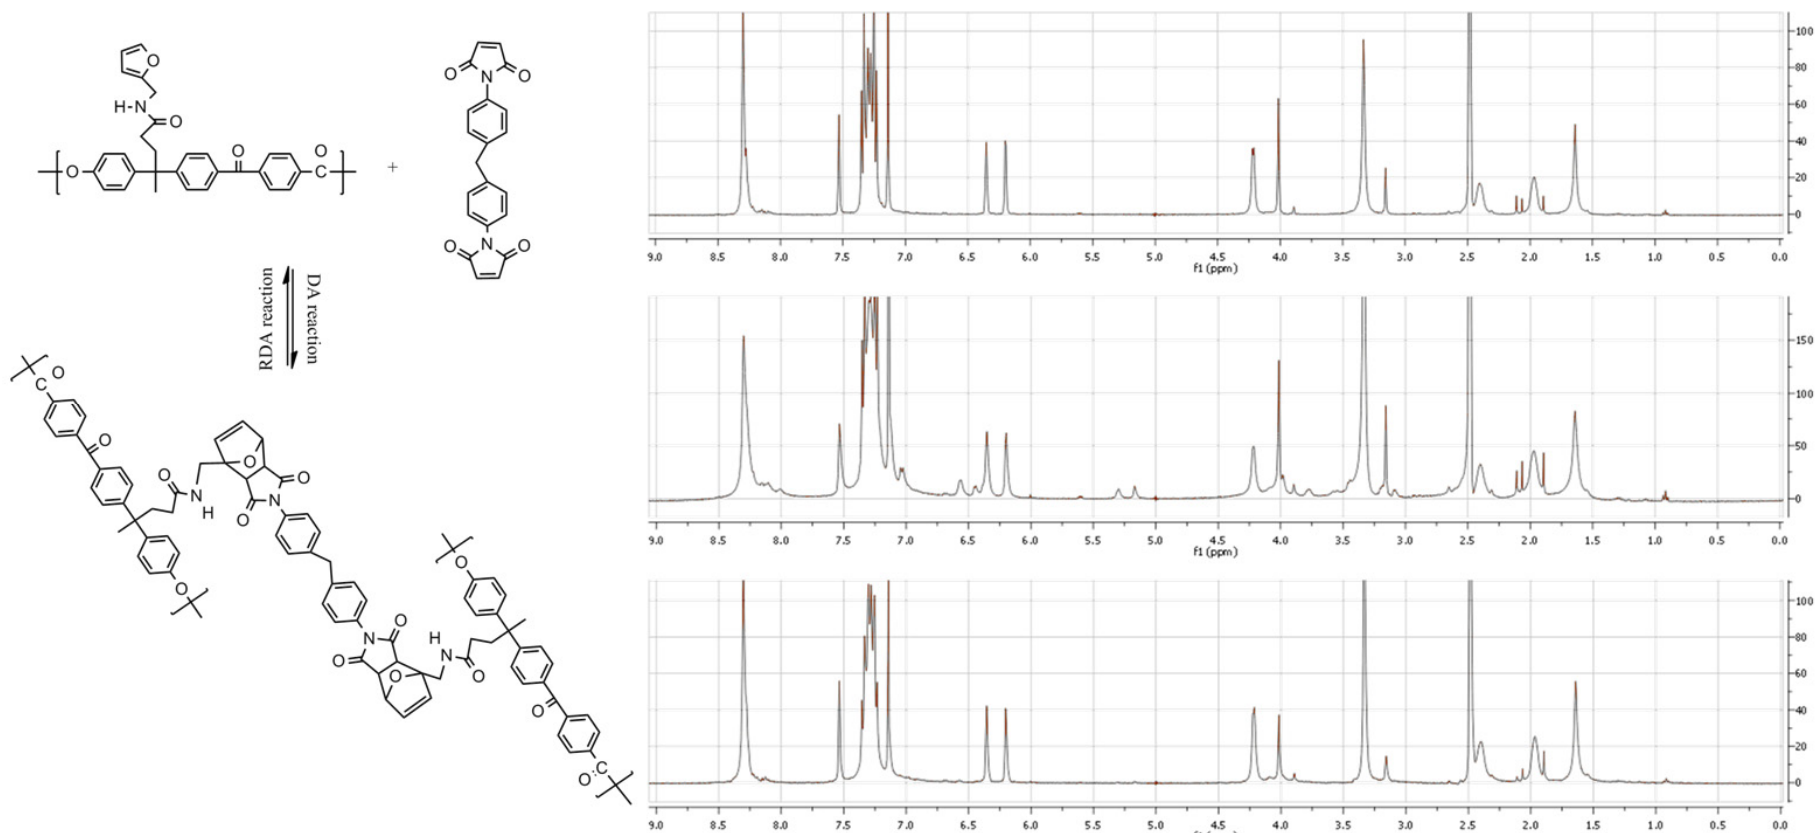

## Chemical structured of Endo and Exo isomers

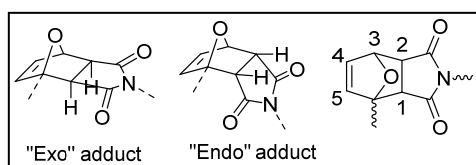

## FT-IR spectra

Blue=spectrum as prepared

Red= spectrum after re-processing

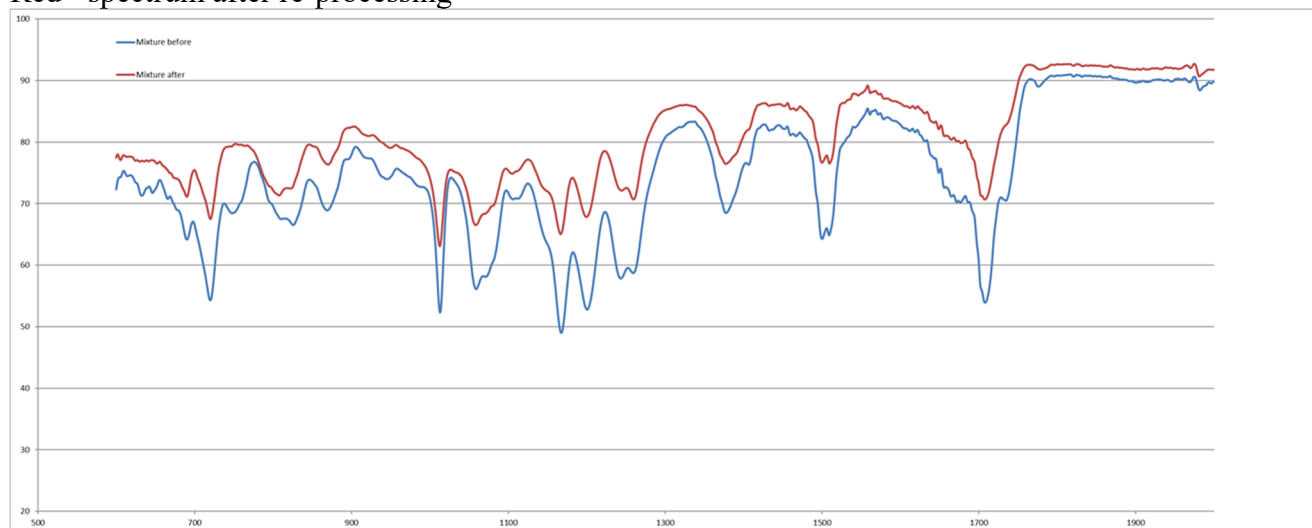

**DA and rDA temperatures**

| Sample          | DA and rDA (via DSC) in °C | rDA (via DMTA) in °C |
|-----------------|----------------------------|----------------------|
| PE-fur/Bism-2:1 | 168/147                    | 146                  |
| PE-fur/Bism-4:1 | 168/150                    | 136                  |

DSC and DMTA temperatures taken during the first heating cycle.
