# Supplementary material for: The Effect of Molecular Weight on the (Re)-Processability and Material Properties of Bio-Based, Thermoreversibly Cross-Linked Polyesters
Source: MDPI journal article supplement (doi:10.3390/app12147287), 2022-07-20
Supplement: s1 [file s1]

Archive with 1 entries (1 files):
- applsci-1585433-supplementary.pdf
